# Supplementary material for: Effects of tuberculosis and/or HIV-1 infection on COVID-19 presentation and immune response in Africa
Source: Springer Nature journal article supplement (doi:10.1038/s41467-022-35689-1), 2023-01-12
Supplement: MOESM1 [file 41467_2022_35689_MOESM1_ESM.pdf]

## **Comorbid tuberculosis and/or HIV-1 infection and COVID-19 presentation and immune response in Africa: Supplementary data**

1. Supplementary Table 1: Final diagnoses in non-COVID-19 control participants.
2. Supplementary Table 2: COVID-19 outcome in relation to presenting features.
3. Supplementary Table 3: Clinical features of COVID-19 participants with tuberculosis and HIV-tuberculosis.
4. Supplementary Table 4: Characteristics of HIV-1 uninfected and infected persons with either immune evidence of tuberculosis sensitization but no symptoms (latent tuberculosis, LTBI) or microbiologically-confirmed pulmonary tuberculosis recruited to previous studies.
5. References.
6. Supplementary Figure 1: Type, number, and frequency and types of co-morbidity present in COVID-19 and ODC participants.
7. Supplementary Figure 2: Relationships between radiographic scores.
8. Supplementary Figure 3: Radiographic appearances of combined SARS-CoV2 and tuberculosis infection in the presence or absence of HIV-1 co-infection.
9. Supplementary Figure 4: Percentage of peripheral lymphocytes CD4 and CD8 positive in relation to COVID-19 severity and the presence or absence of HIV-1 and/or tuberculosis co-morbidities.
10. Supplementary Figure 5: CD8 T cell response to SARS-CoV-2 antigens

**Supplementary Table 1**

|                                                | <b>Disease</b>                                | <b>n</b> | <b>HIV-1<br/>co-infected</b> |
|------------------------------------------------|-----------------------------------------------|----------|------------------------------|
| Non communicable disease (n=20)                | Chronic cardiac failure                       | 7        | 0/7                          |
|                                                | Exacerbation asthma / COPD                    | 6        | 1/6                          |
|                                                | Diabetic keto-acidosis                        | 3        | 0/3                          |
|                                                | Cerebrovascular accident                      | 1        | 0/1                          |
|                                                | Gastro-intestinal                             | 2        | 1/2                          |
|                                                | Pulmonary embolism                            | 1        | 0/1                          |
| Infectious diseases<br>(n=13)                  | HIV-1                                         | 13       | -                            |
|                                                | Tuberculosis                                  | 5        | 5/5                          |
|                                                | <i>Pneumocystis jirovecii</i> pneumonia       | 5        | 5/5                          |
|                                                | Community acquired pneumonia                  | 2        | 0/2                          |
|                                                | Urinary tract infection                       | 1        | 0/1                          |
| Unclear final diagnosis at discharge*          |                                               | 2        | 0/2                          |
| Outpatients from COVID testing<br>centre (n=7) | Lower respiratory tract infection<br>symptoms | 7        | 1/7                          |

**Supplementary Table 1:** Final diagnosis of non-COVID-19 participants.

\*COVID-19 actively excluded

**Supplementary Table 2**

|                                                            | <b>Survived<br/>71.2% (n=74)</b> | <b>Died<br/>28.8% (n=30)</b> |
|------------------------------------------------------------|----------------------------------|------------------------------|
| <b>Age</b> (median, IQR)                                   | 52 [44-57]                       | 55 [46-66]                   |
| <b>Male</b> (% , n)                                        | 54% (n=40)                       | 76.7% (n=23)                 |
| <b>HIV-1 co-infected</b> (% , n)                           | 33.8% (n=25)                     | 20% (n=6)                    |
| on antiretroviral therapy (ART)                            | 72% (n=18)                       | 83.3% (n=5)                  |
| Time on ART (years) <sup>a</sup>                           | 9.5 [6-12]                       | 10 [3.5-11]                  |
| CD4 count (cells/mm <sup>3</sup> ) <sup>a</sup>            | 144 [53-332]                     | 113 [45-270]                 |
| Log Viral load <sup>a</sup>                                | <1.3 [<1.3-4]                    | 3.17 [<1.3-5.21]             |
| <b>M. tuberculosis positive</b> (% , n)                    | 12% (n=9)                        | 20% (n=6)                    |
| Previous tuberculosis episode/s<br>(within 5 years)        | 22.2% (n=2)                      | 33.3% (n=2)                  |
| <b>Co-morbidities</b>                                      |                                  |                              |
| Cardiovascular                                             | 6.7% (n=5)                       | 6.7% (n=2)                   |
| Hypertension                                               | 44.6% (n=33)                     | 56.7% (n=17)                 |
| Diabetes                                                   | 36.5% (n=27)                     | 46.7% (n=14)                 |
| Obesity                                                    | 29.3% (n=22)                     | 33.3% (n=10)                 |
| Other respiratory diseases                                 | 9.2% (n=7)                       | -                            |
| <b>SARS-CoV-2 serology positive<sup>b</sup></b>            | 67.6% (n=50)                     | 73.3% (n=22)                 |
| Cut-off index (median, IQR)                                | 5.5 [0.29-21.95]                 | 13.4 [0.43-35.6]             |
| <b>WHO COVID-19 ordinal scale at<br/>enrolment (% , n)</b> |                                  |                              |
| 3                                                          | 22.6% (n=18)                     | -                            |
| 4                                                          | 44% (n=33)                       | 17.2% (n=5)                  |
| 5                                                          | 22.6% (n=17)                     | 44.8% (n=13)                 |
| 6                                                          | 8.1% (n=6)                       | 36.7% (n=11)                 |
| 7                                                          | -                                | 3.4% (n=1)                   |
| <b>Severe (WHO ≥5)</b>                                     | 31.1% (n=23)                     | 83.3% (n=25)                 |
| <b>Cycle threshold SARS PCR (n=85) <sup>a</sup></b>        | 31.5 [26.8-34]                   | 29.1 [25.4-33.6]             |
| <b>On steroid treatment (% , n)</b>                        | 73% (n=54)                       | 93.3% (n=28)                 |
| <b>Overall days in clinical care <sup>a</sup></b>          | 11 [6-23]                        | 15 [7-22]                    |

**Supplementary Table 2:** COVID-19 Outcome in relation to presenting features.

IQR: interquartile range

<sup>a</sup>: Median and [IQR]

<sup>b</sup>: SARS-CoV-2 serology was performed using the Roche Elecsys assay, measuring SARS-CoV-2 nucleocapsid-specific antibodies. Results are reported as numeric values in form of a cut-off index (signal sample/cut-off), where a COI < 1.0 corresponds to non-reactive plasma and COI ≥ 1.0 to reactive plasma.

**Supplementary Table 3**

| Patient number | Age | HIV-1 status | CD4 /mm <sup>3</sup> | Viral Load | on ART Y/N | Method of TB diagnosis                                                     | Time between + SARS CoV-2 PCR and TB dx | Prior TB episodes | Time since last TB episode | WHO score at enrolment | Outcome    |
|----------------|-----|--------------|----------------------|------------|------------|----------------------------------------------------------------------------|-----------------------------------------|-------------------|----------------------------|------------------------|------------|
| 9              | 37  | -ve          | NA                   | NA         | NA         | sputum Xpert + (Rif S)                                                     | simultaneous                            | 2                 | 3 years                    | 4                      | discharged |
| 36             | 43  | -ve          | NA                   | NA         | NA         | sputum Xpert + (Rif S)                                                     | TB dx 25 days after                     | 0                 | NA                         | 5                      | discharged |
| 57             | 37  | -ve          | NA                   | NA         | NA         | sputum culture + (after 24 days; sputum Xpert ND)                          | TB dx 6 weeks prior                     | 0                 | NA                         | 3                      | discharged |
| 58             | 43  | -ve          | NA                   | NA         | NA         | sputum Xpert + (Rif S)                                                     | simultaneous                            | 0                 | NA                         | 4                      | discharged |
| 73             | 41  | -ve          | NA                   | NA         | NA         | sputum Xpert + (Rif R)                                                     | simultaneous                            | 0                 | NA                         | 6                      | died       |
| 80             | 61  | -ve          | NA                   | NA         | NA         | sputum Xpert + (Rif S)                                                     | TB dx 20 days after                     | 0                 | NA                         | 7                      | died       |
| 125            | 65  | -ve          | NA                   | NA         | NA         | sputum Xpert + (Rif S)                                                     | simultaneous                            | 0                 | NA                         | 6                      | died       |
| 3              | 31  | +ve          | 106                  | ND         | N          | pleural fluid Xpert + (Rif S)                                              | simultaneous                            | 0                 | NA                         | 3                      | discharged |
| 6              | 34  | +ve          | 110                  | 17870      | Y          | sputum Xpert + (Rif S)                                                     | TB dx 3 months prior                    | 0                 | NA                         | 4                      | discharged |
| 61             | 37  | +ve          | 26                   | 523463     | Y          | clinical diagnosis: disseminated TB                                        | TB dx 18 days prior                     | 1                 | 2 years                    | 4                      | died       |
| 93             | 43  | +ve          | 51                   | 2941       | Y          | sputum Xpert + (Rif S), sputum auramine 3+                                 | simultaneous                            | 1                 | 4 months                   | 4                      | died       |
| 95             | 49  | +ve          | 106                  | 15860      | N          | sputum Xpert + (Rif S) and culture positive (Rif S)                        | simultaneous                            | 0                 | NA                         | 3                      | discharged |
| 97             | 55  | +ve          | 17                   | 201574     | N          | pericardial fluid and sputum Xpert                                         | simultaneous                            | 0                 | NA                         | 3                      | discharged |
| 104            | 56  | +ve          | 209                  | LDL        | Y          | sputum Xpert + (Rif S); urine LAM + sputum Xpert + (Rif S)                 | TB dx 21 days after                     | 0                 | NA                         | 5                      | died       |
| 152            | 27  | +ve          | ND                   | 395        | Y          | urine LAM positive, urine Mtb culture positive (TTP 20 days, Rif R, INH S) | simultaneous                            | 2                 | 1 year                     | 3                      | discharged |

**Supplementary Table 3:** Clinical features of COVID-19 participants with tuberculosis and HIV-tuberculosis.

Diagnoses of COVID-19 and TB occurring within 5 days of each other were denoted “simultaneous”.

+ve: positive, -ve: negative, dx: diagnosis, INH: isoniazid, LAM: Lipoarabinomannan, LDL: Lower than Detectable Limit, Mtb: *Mycobacterium tuberculosis*, NA: not applicable, ND: not done, Rif: Rifampicin, R: resistant, S: sensitive, TTP: time to positivity

**Supplementary Table 4**

|                                                 | <b>HC (HIV-/aTB-)</b> | <b>HIV+/aTB-</b> | <b>HIV-/aTB+</b> | <b>HIV+/aTB+</b> |
|-------------------------------------------------|-----------------------|------------------|------------------|------------------|
| n                                               | 72                    | 29               | 28               | 34               |
| Age <sup>a</sup>                                | 32 [26-38]            | 34 [32-42]       | 33 [28-47]       | 37 [32-45]       |
| Male (%)                                        | 48.6%                 | 24.1%            | 71.4%            | 73.5%            |
| CD4 count (cells/mm <sup>3</sup> ) <sup>a</sup> | nd                    | 481 [358-700]    | nd               | 236 [121 - 355]  |
| Log HIV viral load <sup>a</sup>                 | na                    | <1.3 [<1.3-4.18] | na               | 4.49 [2.19-5.00] |
| On ART (%)                                      | na                    | 80.6 %           | na               | 38.9%            |
| Unaffected Lung (%) <sup>a</sup>                | na                    | na               | 50 [30-70]       | 60 [30-90]       |
| CRP (µg mL <sup>-1</sup> ) <sup>a</sup>         | 1 [1-4]               | 3 [2-10]         | 100 [27.5-115]   | 72 [36-123]      |

**Supplementary Table 4:** Characteristics of healthy controls (HC) and mono- and co-infected HIV-1 (HIV+) and microbiologically confirmed pulmonary tuberculosis (TB+) controls, recruited to previous studies <sup>1,2</sup>.

ART: Anti-retroviral treatment, CRP: C-reactive protein, nd: not done, na: not applicable.

<sup>a</sup> Medians and [interquartile range]

## Supplementary References

1. Du Bruyn, E., *et al.* *Mycobacterium tuberculosis*-specific CD4 T cells expressing CD153 inversely associate with bacterial load and disease severity in human tuberculosis. *Mucosal Immunol* **14**, 491-499 (2021).
2. Riou, C., *et al.* Disease extent and anti-tubercular treatment response correlates with *Mycobacterium tuberculosis*-specific CD4 T-cell phenotype regardless of HIV-1 status. *Clin Transl Immunology* **9**, e1176 (2020).

Co-morbidities

Hypertension (n=50/23)  
Diabetes (n=41/12)  
Obesity (n=34/14)  
HIV-1 (n=31/13)  
Active tuberculosis (n=15/5)  
Cardiovascular (n=7/18)  
Other respiratory (n=7/11)  
Kidney disease (n=4/0)  
Malignancy (n=3/0)  
Immunosuppressive therapy (n=1/1)  
Transplant recipient (n=1/0)

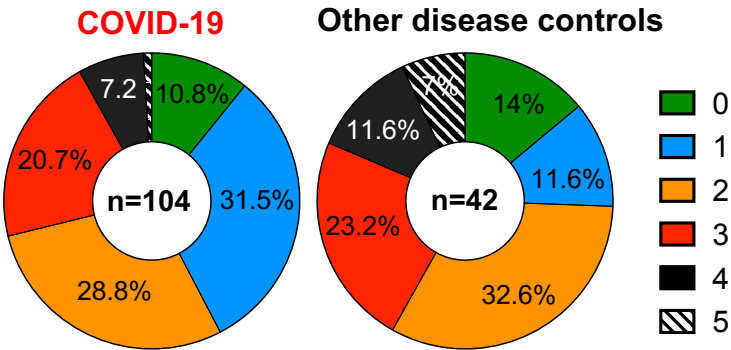

Extended Figure 1

Type, number, and frequency and types of co-morbidity present in COVID-19 and other disease control (ODC) participants.

# Supplementary Figure 2

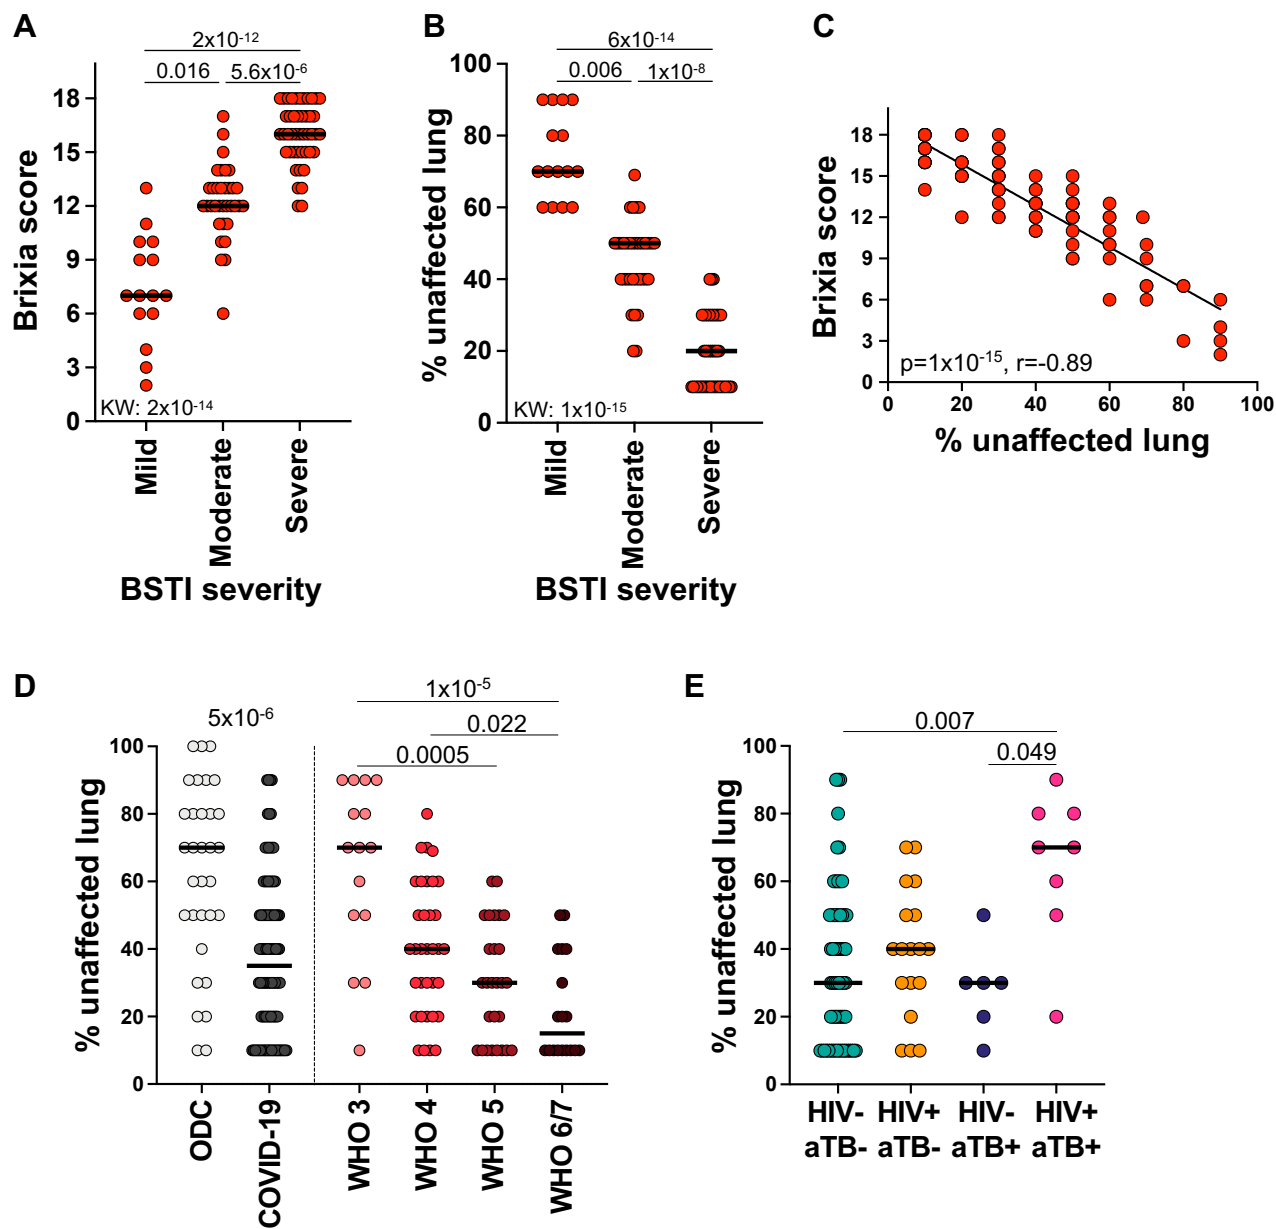

**Extended Figure 2 Relationships between radiographic scores in n=104 SARS-CoV-2 patients**

**A** Relationship between Brixia and British Society for Thoracic Imaging (BSTI) radiographic severity scores (3, 4).

**B** Inverse relationship between the BSTI radiographic severity score and the percentage unaffected lung.

**C** Inverse correlation between percentage of lung unaffected and Brixia severity score. Non-parametric Spearman correlation.

**D** Percentage unaffected lung scores in non-COVID-19 hospitalized patients (ODC) and COVID-19 patients and relationship between percentage unaffected lung and WHO clinical severity score

**E** Relationship between the absence (-) or presence (+) of HIV-1 and/or tuberculosis (TB) co-infection and percentage unaffected lung in COVID-19 patients.

Statistical comparisons were performed by the two-sided Kruskal-Wallis test (with Dunn's multiple comparison adjustments) in A, B, E and for the comparison of unaffected lung scores between patients grouped by WHO score. The comparison of OCD vs COVID-19 in D was done using a two-sided Mann-Whitney test.



## Supplementary Figure 3

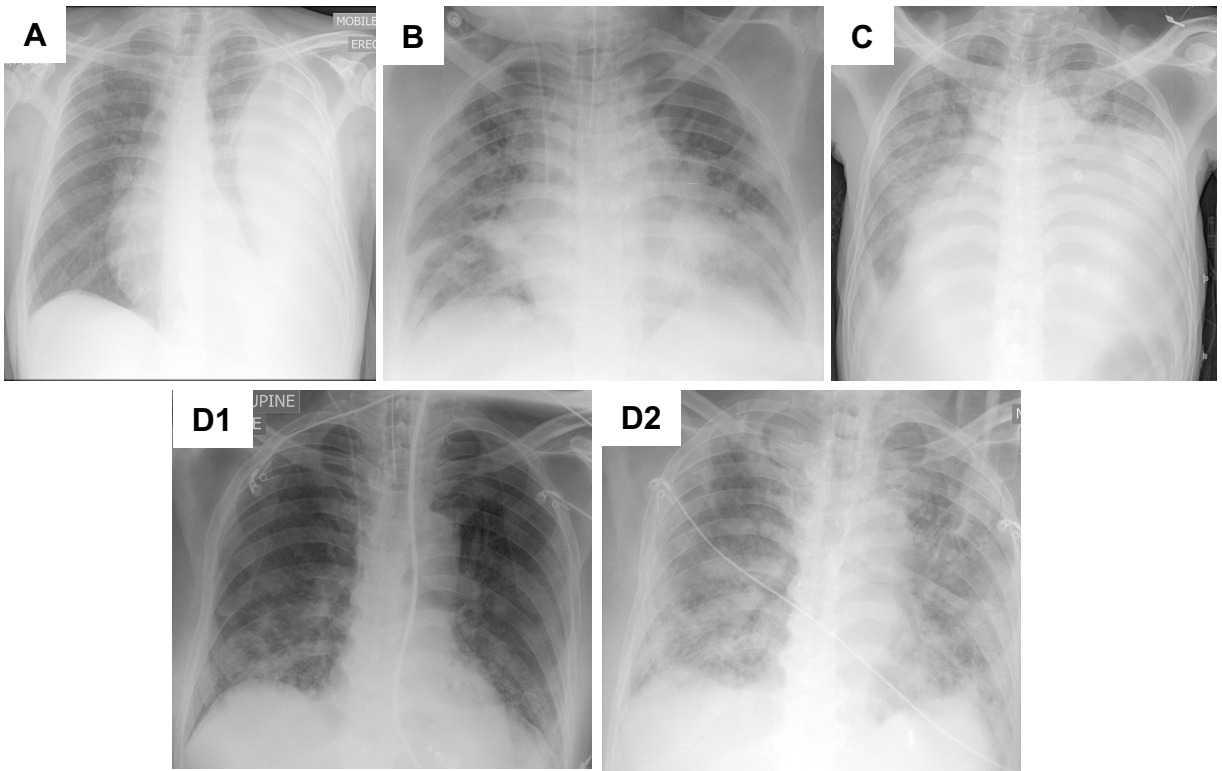

### Extended Figure 3 Radiographic appearances of combined SARS-CoV2 and tuberculosis infection in the presence or absence of HIV-1 co-infection

- A.** 31-year-old HIV-1 infected antiretroviral-naïve female (patient number 3) with a CD4 count of 106 cells/mm<sup>3</sup> presenting with a large left pleural effusion that yielded a positive Gene Xpert MTB/Rif result. Also, SARS-CoV-2 RT-PCR positive with threshold cycle of 23.03. Uneventful course and discharged after 15 days on antitubercular therapy.
- B.** 41-year-old HIV-1 uninfected female patient number 73) with hypertension, obesity and type II diabetes mellitus. SARS-CoV-2 RT-PCR positive and WHO grade 6. Admitted to intensive care where a tracheal aspirate was Gene Xpert TB/Rif positive with rifampin resistance detected. The patient had a complicated course with *Candida albicans* and *Serratia marcescens* superinfections and died after 21 days.
- C.** 55-year-old HIV-1 infected antiretroviral-naïve male (patient number 97) with a CD4 count of 17 cells/mm<sup>3</sup> presenting with a large pericardial effusion that was Gene Xpert MTB/Rif test positive. Also respiratory tract SARS-CoV-2 RT-PCR test was positive. Pericardiocentesis was performed and the patient was commenced on antitubercular therapy and discharged well to stepdown care after 7 days' admission.
- D.** 61-year-old HIV-1 uninfected male (patient number 80) with hypertension, obesity and type II diabetes mellitus presented ketoacidotic and in severe respiratory failure. SARS-CoV-2 RT-PCR positive. Intubated and ventilated. By day 25 of intensive care admission, radiographic deterioration prompted a Gene Xpert MTB/Rif test which was positive. The patient developed multiorgan failure and died on day 28 of admission.

# Supplementary Figure 4

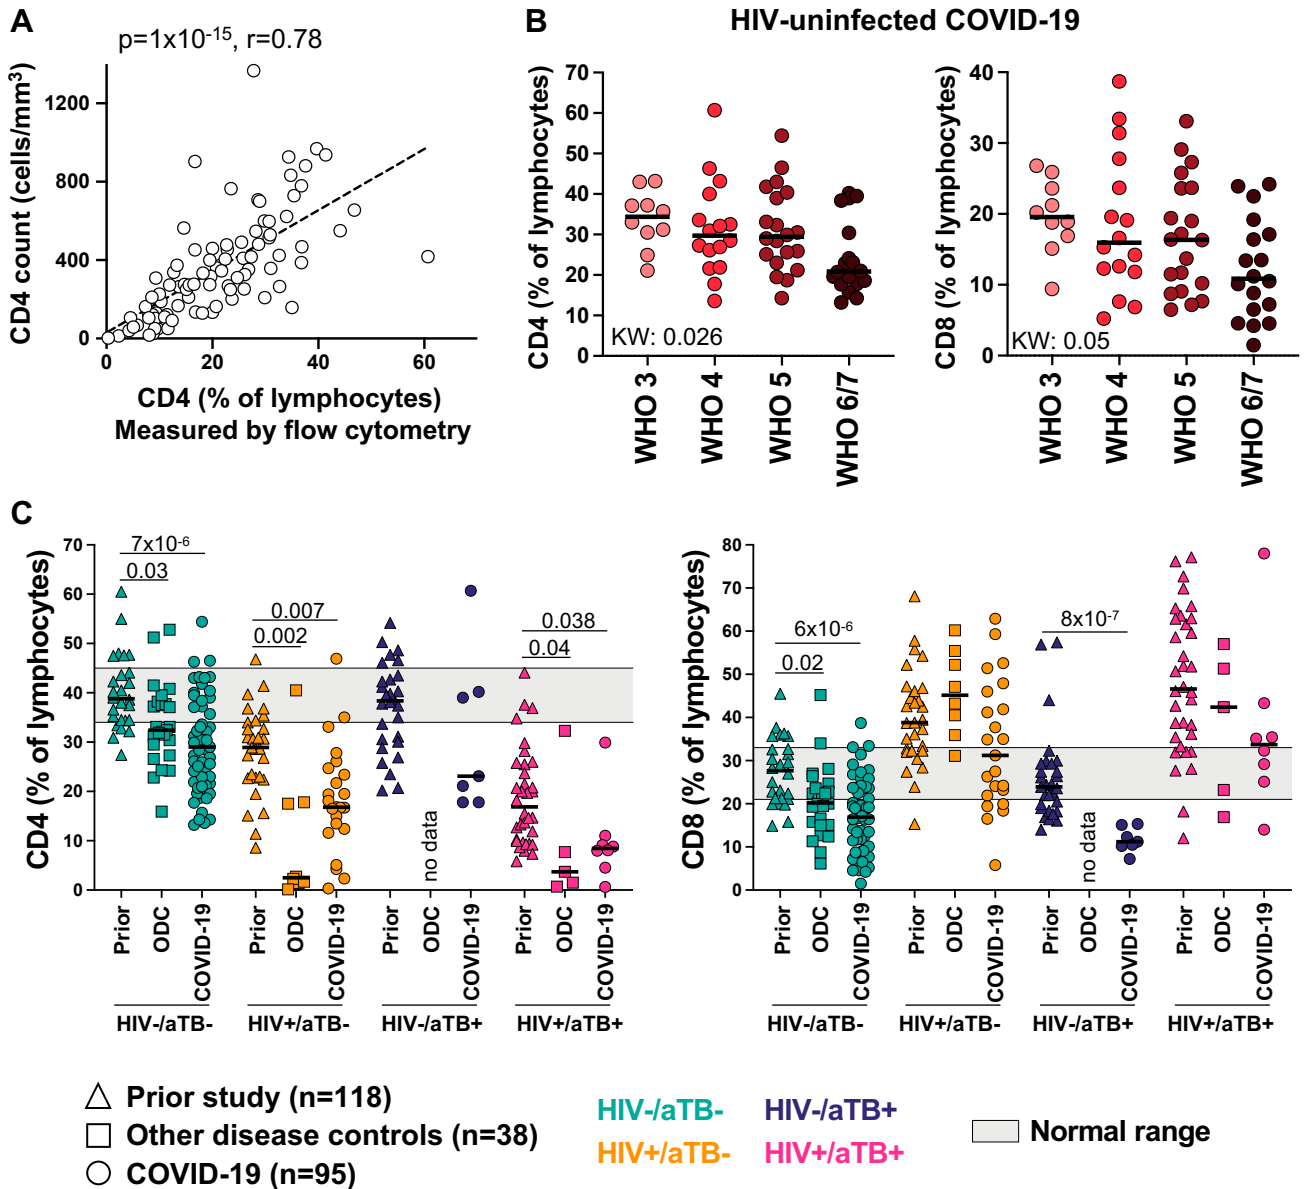

## Extended Figure 4 Percentage of peripheral lymphocytes CD4 and CD8 positive in relation to COVID-19 severity and the presence or absence of HIV-1 and/or tuberculosis co-morbidities

**A.** Correlation between absolute CD4 lymphocyte count determined by coulter analysis and the CD4 percentage determined by flow cytometric analysis. Correlation was tested by a two-tailed non-parametric Spearman rank test.

**B.** Amongst  $n=73$  HIV-1 uninfected patients with COVID-19 there was a trend towards a lower percentage of lymphocytes positive for CD4 (B) and CD8 T cells with increasing WHO grade severity, which was significant for CD4 (Kruskal Wallis test).

**C.** Additional control values were obtained from a subset of participants enrolled to a prior study of 118 ambulant HIV-1 uninfected and infected persons with either immune evidence of tuberculosis sensitization but no symptoms or microbiologically-confirmed pulmonary tuberculosis. When compared to HIV-1 uninfected healthy persons, the percentage of lymphocytes positive for CD4 was lower in both HIV-1 uninfected ODC and more so in COVID-19 patients. The pattern was reversed amongst HIV-1 infected patients with CD4 lymphocytes being especially low for ODC. Amongst patients with coincident HIV-1 and tuberculosis infection, % CD4 was very low irrespective of the presence or absence of SARS-CoV2 infection. When compared to HIV-1 uninfected healthy persons, the percentage of lymphocytes positive for CD8 was also lower in both HIV-1 uninfected ODC and more so in COVID-19 patients. However, this pattern was not observed amongst HIV-1 infected patients. The % CD8 positive lymphocyte was markedly depressed in HIV-1 uninfected patients with coincident tuberculosis and SARS-CoV2 infection. Comparisons between groups were performed using a Kruskal-Wallis test.

## Supplementary Figure 5

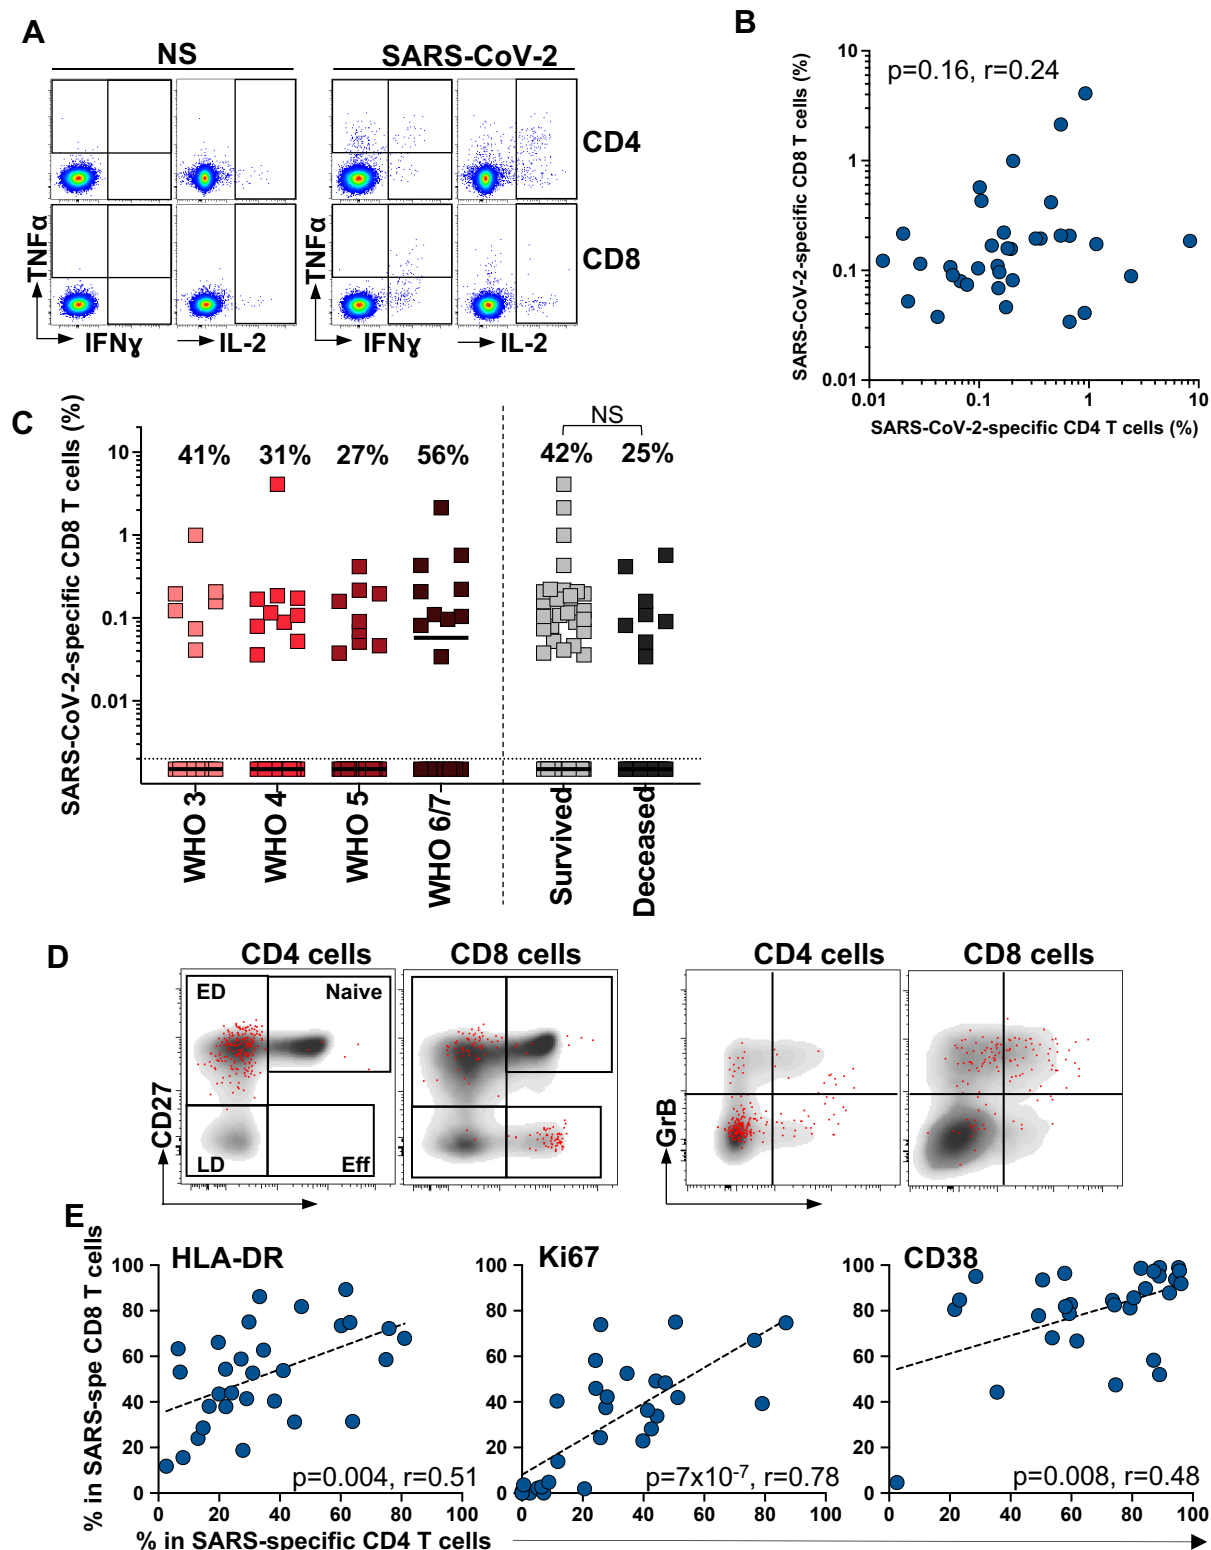

### Extended Figure 5

**A.** Representative flow cytometry plots of IFN- $\gamma$ , IL-2 and TNF- $\alpha$  expression in CD4 and CD8 T cells in responses to SARS-CoV-2 peptides. NS = no stimulation.

**B.** Association between SARS-CoV-2-specific CD4 and CD8 T cells in COVID-19 patients ( $n = 34$ ). Correlation was tested by a two-tailed non-parametric Spearman rank test.

**C.** Prevalence and frequency of SARS-CoV-2-specific CD8 T cells in  $n=73$  COVID-19 patients. Patients were stratified according to WHO ordinal score and outcome. Contingency analysis was performed by Chi-squared test

**D.** Overlay flow plots of CD45RA, CD27, Granzyme B, and HLA-DR expression. Red dots depict SARS-CoV-2-specific CD4 or CD8 T cells and density plots depict total CD4 or CD8 T cells. Four memory subsets can be delineated: Naive (CD45RA<sup>+</sup>CD27<sup>+</sup>), early differentiated (ED, CD45RA<sup>+</sup>CD27<sup>+</sup>), late differentiated (LD, CD45RA<sup>+</sup>CD27<sup>-</sup>) and effector (Eff, CD45RA<sup>+</sup>CD27<sup>-</sup>)

**E.** Association between the expression of HLA-DR, Ki-67 and CD38 in SARS-CoV-2-specific CD8 T cells and SARS-CoV-2-specific CD4 T cells. Correlations were tested by two-tailed non-parametric Spearman rank test.
